# Supplementary material
Source: PubMed Central journal article supplement (PMC2077258)

1.HA A V H V E K Q K P A V S V R K S V Q D D H I V C L E C G G S F K S L E R H L T T H K S H T P E E Y R 50.HA

1.CA A V H V E K Q K P A V S V R K S V Q D D H I V C L E C G G S F K S L E R H L T T H K S H T P E E Y R 50.CA

1.CB A V H V E K Q K P A V S V R K S V Q D D H I V C L E C G G S F K S L E R H L T T H K S H T P E E Y R 50.CB

1.HA 50.HA

1.CA 50.CA

1.CB 50.CB

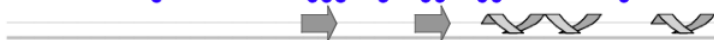

51.HA E K W D L P V D Y P H V A P A Y A E A R S R L A K E H G L G Q R R K A H R 100.HA

51.CA E K W D L P V D Y P H V A P A Y A E A R S R L A K E H G L G Q R R K A H R 100.CA

51.CB E K W D L P V D Y P H V A P A Y A E A R S R L A K E H G L G Q R R K A H R 100.CB

51.HA 100.HA

51.CA 100.CA

51.CB 100.CB

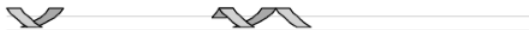

Supplement: pnas_0706659104_2.pdf [file pnas_0706659104_2.pdf]
