# Supplementary material
Source: PubMed Central journal article supplement (PMC2077258)
Supplement: pnas_0706659104_4.pdf [file pnas_0706659104_4.pdf]

**Table 2. Model selection statistics.**

| Model                                                   | No. of residues |
|---------------------------------------------------------|-----------------|
| <i>Model 1</i><br>$(S^2_j)$                             | 43              |
| <i>Model 2</i><br>$(S^2_j, \tau_e)$                     | 3               |
| <i>Model 3</i><br>$(S^2_j, Rex)$                        | 2               |
| <i>Model 4</i><br>$(S^2_j, \tau_e, Rex)$                | -               |
| <i>Model 5</i><br>$(S^2_{\alpha}, S^2_{\beta}, \tau_e)$ | 12              |

Numbers of residues fitting to each of the five models are indicated.
