# Supplementary material
Source: PubMed Central journal article supplement (PMC2077258)

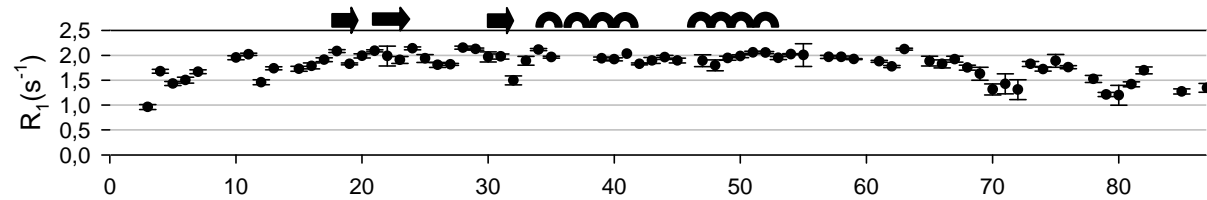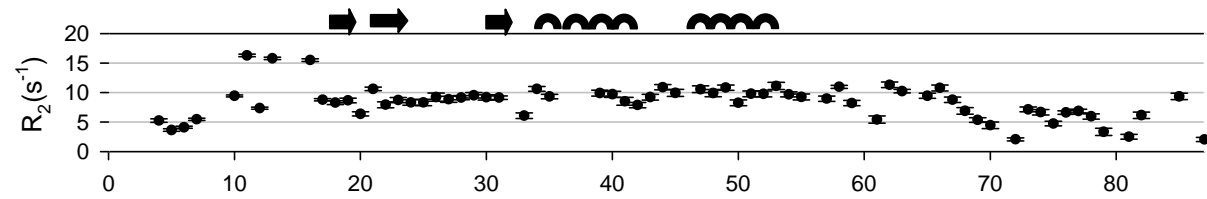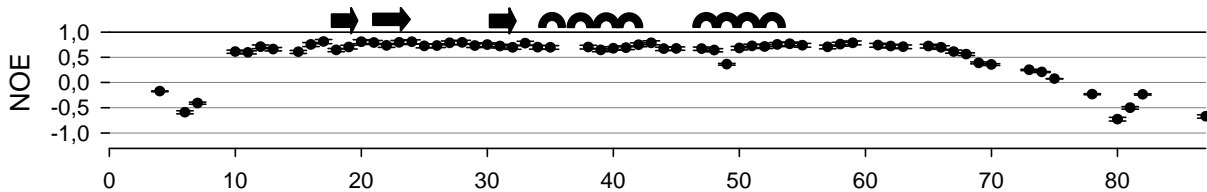

Supplement: pnas_0706659104_3.pdf [file pnas_0706659104_3.pdf]
